# Supplementary material for: COVID-19 Neuropathology: Evidence for SARS-CoV-2 invasion of Human Brainstem Nuclei
Source: Research Square preprint supplement (doi:10.21203/rs.3.rs-1055802/v1), 2021-11-15
Supplement: Supplementary file 2 [file ca284262b281e17cd2138def.docx]

| Level of Sectioning | FOV1 | FOV2 | FOV3 | FOV4 | FOV5 | FOV6 |
| --- | --- | --- | --- | --- | --- | --- |
| Medulla | Tegmentum: Dorsal Motor Nucleus of the Vagus, Solitary Tract Nucleus, Area Postrema | Tegmentum: Hypoglossal Nucleus, Intercalate Nucleus, Medial Longitudinal Lemniscus, Dorsal Medullary Reticular Formation | Tegmentum: Nucleus Ambiguus, Ventral Medullary Reticular Formation. | Basis: Medial Lemniscus, Medial Accessory Olivary Nucleus, Inferior Olivary Complex (Medial Part) | Basis: Inferior Olivary Complex (Lateral Part). | Basis: Pyramidal Tract. |
| Pons | Tegmentum: Dorsal Tegmentum, Abducens Nucleus, Medial Longitudinal Fasciculus. | Tegmentum: Ventrolateral Tegmentum, Facial Nucleus, Spinal Trigeminal Tract and Nucleus. | Tegmentum: Ventromedial Tegmentum, Medial lemniscus, Central Tegmental Tract. | Basis: Dorsomedial basis pontis, basilary nuclei of the pons, cortico-spinal tract. | Basis: Lateral basis pontis, basilary nuclei of the pons, cortico-spinal tract. | Basis: Ventromedial basis pontis, basilary nuclei of the pons, cortico-spinal tract. |
| Midbrain | Tegmentum: Lateral part of the Substantia Nigra, Red Nucleus | Tegmentum: Medial part of the Substantia Nigra. | Tectum: Quadrigeminal Plate, Periacqueductal Gray. | Tegmentum / Tectum interface, Mesencephalic reticular formation. | Basis: lateral part of the cerebral peduncle. | Basis: medial part of the cerebral peduncle. |
